# Supplementary material
Source: PubMed Central journal article supplement (PMC8549801)
Supplement: NIHMS1728333-supplement-Supplementary_materials.pdf [file NIHMS1728333-supplement-Supplementary_materials.pdf]

## Operationalizing genomic epidemiology during the Nord Kivu Ebola outbreak, Democratic Republic of the Congo: Supplementary Information

**Extended Data Table 1:** Ebola virus primer scheme generated by Primal Scheme.

| Name                 | Sequence                      | Pool |
|----------------------|-------------------------------|------|
| DRCMAN2018V_1_LEFT   | CGGACACACAAAAAGAAAGAAGAATTTT  | 1    |
| DRCMAN2018V_1_RIGHT  | GGGTTGTTGAATCTCCAATCCTCT      | 1    |
| DRCMAN2018V_3_LEFT   | AACAGGGGATTGTTGCGGCAAAG       | 1    |
| DRCMAN2018V_3_RIGHT  | CAAAGGAGAGAACTGACCGGC         | 1    |
| DRCMAN2018V_5_LEFT   | GCTTGGCAATCAGTAGGACACA        | 1    |
| DRCMAN2018V_5_RIGHT  | CCGAGTGCAATTGCCGATAGTT        | 1    |
| DRCMAN2018V_7_LEFT   | TGAACTTCCATCAGAAAAAGAACGAAA   | 1    |
| DRCMAN2018V_7_RIGHT  | TGCTGGCCCTTTTACTGTTTT         | 1    |
| DRCMAN2018V_9_LEFT   | CAATTAACGAAGAGGCGGACCC        | 1    |
| DRCMAN2018V_9_RIGHT  | TCAAGGGAGTCTGGATACGTGT        | 1    |
| DRCMAN2018V_11_LEFT  | ACAAGAATAAATTCATGGCAATCCTGC   | 1    |
| DRCMAN2018V_11_RIGHT | ACGATCGTGTAATGTTGGGCA         | 1    |
| DRCMAN2018V_13_LEFT  | TCAAAACGACAGAATGCCAGGC        | 1    |
| DRCMAN2018V_13_RIGHT | ACCGGTTGTCATCACCAGAAGA        | 1    |
| DRCMAN2018V_15_LEFT  | AGTGTTAGGGAGGCATTCAACAA       | 1    |
| DRCMAN2018V_15_RIGHT | CTCGATCAATCTTGGGCGATGG        | 1    |
| DRCMAN2018V_17_LEFT  | TGAGTATCAGCCCTGGATAATATAAGTCA | 1    |
| DRCMAN2018V_17_RIGHT | TCCCATTGACTGACTCTGGTG         | 1    |
| DRCMAN2018V_19_LEFT  | GCTTCCTCTAGGTGTCGCTGAT        | 1    |
| DRCMAN2018V_19_RIGHT | TTAGATCGGCACTGTTCCCCTT        | 1    |
| DRCMAN2018V_21_LEFT  | TCATGGGAATCGAAGTGCCAGA        | 1    |
| DRCMAN2018V_21_RIGHT | ACATTTAGGAGAGGAAAAAGACAATGGT  | 1    |
| DRCMAN2018V_23_LEFT  | TCTTTCTCATTGCACATACTCTTTGC    | 1    |

|                      |                               |   |
|----------------------|-------------------------------|---|
| DRCMAN2018V_23_RIGHT | TGATGTCCTCTTGAATCGATCACG      | 1 |
| DRCMAN2018V_25_LEFT  | AGTTGGACTGAATCTCGAAGGGA       | 1 |
| DRCMAN2018V_25_RIGHT | TCAAGGGGTGTGAGCTGAAGAA        | 1 |
| DRCMAN2018V_27_LEFT  | TCTGCTCCAGCTGAATGAGACA        | 1 |
| DRCMAN2018V_27_RIGHT | CACGGGTGTATTATGGGTGCTG        | 1 |
| DRCMAN2018V_29_LEFT  | AAACAGAGAACGCCAACACGAG        | 1 |
| DRCMAN2018V_29_RIGHT | TGAAGAGCTTGAGTCGTCTCGT        | 1 |
| DRCMAN2018V_31_LEFT  | GGACTGCTGTATCGAACCACATG       | 1 |
| DRCMAN2018V_31_RIGHT | TGTCAAACCTTGTTTATGATTAAGTGA   | 1 |
| DRCMAN2018V_33_LEFT  | TCATCCTCGATTCTACAATCATGACAG   | 1 |
| DRCMAN2018V_33_RIGHT | TCCTTAGGTGCTGGAGGAACTG        | 1 |
| DRCMAN2018V_35_LEFT  | AGAACAACAATTAATATAACTGCACCCA  | 1 |
| DRCMAN2018V_35_RIGHT | GTCGGTCCCATTGTTGCCATAG        | 1 |
| DRCMAN2018V_37_LEFT  | GAACATTGGTTCCTCAATCAGATAATGAG | 1 |
| DRCMAN2018V_37_RIGHT | GGATGGATCGTTGCTACCTCCT        | 1 |
| DRCMAN2018V_39_LEFT  | GGAGGAGGTGTTTGGTATTGGC        | 1 |
| DRCMAN2018V_39_RIGHT | ATGGAGTTGACCTGGTGGAGTT        | 1 |
| DRCMAN2018V_41_LEFT  | AACCATGGCTAAAGCTACGGGA        | 1 |
| DRCMAN2018V_41_RIGHT | TCAGAGATCAGACCAAGGGCTC        | 1 |
| DRCMAN2018V_43_LEFT  | CGGATTGTTGAGCAGTATTGAAATTGG   | 1 |
| DRCMAN2018V_43_RIGHT | GTGTCAACTTGAAGCTGGCTT         | 1 |
| DRCMAN2018V_45_LEFT  | CGCAGGTCACATGTGTTAGATTTC      | 1 |
| DRCMAN2018V_45_RIGHT | TCGCCACTGGTACATCACTCAA        | 1 |
| DRCMAN2018V_47_LEFT  | GTGGGTGCTCAAGAAGACTGTG        | 1 |
| DRCMAN2018V_47_RIGHT | GCACATTATCAAGACGTCGGCA        | 1 |
| DRCMAN2018V_49_LEFT  | TCTATGCTTTACCAGAGCGGAGA       | 1 |
| DRCMAN2018V_49_RIGHT | GCTTTTAGCACCGTAGCGTGTT        | 1 |
| DRCMAN2018V_51_LEFT  | AACTACTATGGGAATTTTACCACCTTGA  | 1 |

|                      |                                |   |
|----------------------|--------------------------------|---|
| DRCMAN2018V_51_RIGHT | GTGTTTGAACATTGCGAGTCGG         | 1 |
| DRCMAN2018V_53_LEFT  | ACATGCCACAGTTAGAGGGAGT         | 1 |
| DRCMAN2018V_53_RIGHT | TCGTCTGCGTCAGTCTCTAAGG         | 1 |
| DRCMAN2018V_55_LEFT  | GAATGGGGTCCAATTGCCTCAG         | 1 |
| DRCMAN2018V_55_RIGHT | AACTGGATCTCCTAGATTCCGGT        | 1 |
| DRCMAN2018V_57_LEFT  | GGATTAATGTCCCTGGGTTCGC         | 1 |
| DRCMAN2018V_57_RIGHT | TATTTGGGTAAAGCCTCCGCC          | 1 |
| DRCMAN2018V_59_LEFT  | ATGTCCGCAGTGTTCAAATGCA         | 1 |
| DRCMAN2018V_59_RIGHT | GGCCATGAAAGAATGAGGACTGT        | 1 |
| DRCMAN2018V_61_LEFT  | TTTCCAGAATGTTATAAATTATGCAGTTGC | 1 |
| DRCMAN2018V_61_RIGHT | TCTCCACTGCTAATTGGGTCTGT        | 1 |
| DRCMAN2018V_63_LEFT  | GCTCATTGCGAATACTTAAGCCG        | 1 |
| DRCMAN2018V_63_RIGHT | TGCATGGAAGAAATTGCTGGCT         | 1 |
| DRCMAN2018V_65_LEFT  | CACATGATGGCACTGAACGGAA         | 1 |
| DRCMAN2018V_65_RIGHT | TGCATGGACGAGACTATAACGG         | 1 |
| DRCMAN2018V_67_LEFT  | ACACGCTAGCTACTGAGTCCAG         | 1 |
| DRCMAN2018V_67_RIGHT | TCTAGCACTTGACGTTATTGGCT        | 1 |
| DRCMAN2018V_69_LEFT  | CCCATACTGGCTAAGTCATTTAACTCA    | 1 |
| DRCMAN2018V_69_RIGHT | TGCACACACTAATCAACTCTGGT        | 1 |
| DRCMAN2018V_71_LEFT  | TTGAATTACCGTGCATAGTATCCTGA     | 1 |
| DRCMAN2018V_71_RIGHT | AGAAGTCGTGTTATCAACCAAACACT     | 1 |
| DRCMAN2018V_2_LEFT   | CTCTGCAGGGTGATCCAACAAC         | 2 |
| DRCMAN2018V_2_RIGHT  | GGAAACTGTCCGCACTCTCTTG         | 2 |
| DRCMAN2018V_4_LEFT   | AGTGAAGCGCCTTGAGGAATTG         | 2 |
| DRCMAN2018V_4_RIGHT  | TGAAATCACAGCATCGTTGGCA         | 2 |
| DRCMAN2018V_6_LEFT   | GGTGAACTCCTTTAAGGCTGCA         | 2 |
| DRCMAN2018V_6_RIGHT  | TCCACTTGTTTTGGGCAGTGAC         | 2 |
| DRCMAN2018V_8_LEFT   | AGTTATTCGAAAACGGCATGAGT        | 2 |

|                      |                             |   |
|----------------------|-----------------------------|---|
| DRCMAN2018V_8_RIGHT  | AGTGATCTCTGTATACGGGGGC      | 2 |
| DRCMAN2018V_10_LEFT  | TCGCCACATTTTAAGATCACAGGG    | 2 |
| DRCMAN2018V_10_RIGHT | ACACCTTAGACATCAAGAATTCTTCCT | 2 |
| DRCMAN2018V_12_LEFT  | CGTTAAGCCACAGTTGTAGCCA      | 2 |
| DRCMAN2018V_12_RIGHT | CTGCATTTGGGATACGTGGCAT      | 2 |
| DRCMAN2018V_14_LEFT  | GCATCAGAATCATTAGAGCAACGC    | 2 |
| DRCMAN2018V_14_RIGHT | AAGCAGTTCCAAAACCAGGCAA      | 2 |
| DRCMAN2018V_16_LEFT  | ACGAAAAGAGTTCCAATCTTCCAAGA  | 2 |
| DRCMAN2018V_16_RIGHT | TCATCACTTTTGGTTTGGGTACCT    | 2 |
| DRCMAN2018V_18_LEFT  | GGCGGGTTATATTGCCTACTGC      | 2 |
| DRCMAN2018V_18_RIGHT | GCCGATTGACTCTGACAAGTGG      | 2 |
| DRCMAN2018V_20_LEFT  | ACCGATGACTCCAACAGGAT        | 2 |
| DRCMAN2018V_20_RIGHT | CTTGCAGGAGAATGACACGTGT      | 2 |
| DRCMAN2018V_22_LEFT  | CCAGTTTTACAGAATCTTCTCAGGGA  | 2 |
| DRCMAN2018V_22_RIGHT | ACAACCTAGAAATGGGTCCCGA      | 2 |
| DRCMAN2018V_24_LEFT  | TAGGGGTCGTCAGGTCCTTTTTC     | 2 |
| DRCMAN2018V_24_RIGHT | TTTCAGCCCATTACCAGCTTC       | 2 |
| DRCMAN2018V_26_LEFT  | CAAAGAGGGTGCTTTCTTCCTGT     | 2 |
| DRCMAN2018V_26_RIGHT | TAGTTTCCCAGAAGGCCCACTC      | 2 |
| DRCMAN2018V_28_LEFT  | TGCAATGGTTCAAGTGCACAGT      | 2 |
| DRCMAN2018V_28_RIGHT | CTGGCACTCTCTTCTCCGGTAT      | 2 |
| DRCMAN2018V_30_LEFT  | CGGACTGGCCTGGATACCATAT      | 2 |
| DRCMAN2018V_30_RIGHT | CTGTCTCCATCCTGTCCACCAA      | 2 |
| DRCMAN2018V_32_LEFT  | AGCAAAGCTCAGCCTCAAATCA      | 2 |
| DRCMAN2018V_32_RIGHT | TGCTTTATGTGTGTTGGGTTGCA     | 2 |
| DRCMAN2018V_34_LEFT  | TCGAGCACGATCATCATCCAGA      | 2 |
| DRCMAN2018V_34_RIGHT | CCAGTGTTCTGCCGTCTTGATC      | 2 |
| DRCMAN2018V_36_LEFT  | TCCCAGCTGAGTCTTTTATGTGAGA   | 2 |

|                      |                              |   |
|----------------------|------------------------------|---|
| DRCMAN2018V_36_RIGHT | CGGAGTATTGTGATCAAGTAGAAGGT   | 2 |
| DRCMAN2018V_38_LEFT  | ACAACCCTAACAGTGACCAAAGG      | 2 |
| DRCMAN2018V_38_RIGHT | GCCTCTAGGGGCCTAATCTGAA       | 2 |
| DRCMAN2018V_40_LEFT  | ACGCTACAAAAGTGTCTCTAAGCT     | 2 |
| DRCMAN2018V_40_RIGHT | CAGCCCAATAAACCTTCCACCC       | 2 |
| DRCMAN2018V_42_LEFT  | CCGAATTCTACAATTGAATCACCGC    | 2 |
| DRCMAN2018V_42_RIGHT | TGAAGGAGGGAAAATTCGCCG        | 2 |
| DRCMAN2018V_44_LEFT  | TGCTGACTCAATAGTTATCTTGACATCT | 2 |
| DRCMAN2018V_44_RIGHT | ACACGGAAAGACCCAATAAGCA       | 2 |
| DRCMAN2018V_46_LEFT  | AGTCACTAGAGCTTGCGGGTTA       | 2 |
| DRCMAN2018V_46_RIGHT | ACCCCTTCGAGTCAAATAGCC        | 2 |
| DRCMAN2018V_48_LEFT  | CTGAACACACAAGGAATCCCCC       | 2 |
| DRCMAN2018V_48_RIGHT | GAATCGGCCCTTCCTTTCAGTG       | 2 |
| DRCMAN2018V_50_LEFT  | GGAGATGACGCCACAACA ACTT      | 2 |
| DRCMAN2018V_50_RIGHT | ATACTGCATCCCAGCATGTCCT       | 2 |
| DRCMAN2018V_52_LEFT  | TTTCCTACGCGCAAAA ACTCGA      | 2 |
| DRCMAN2018V_52_RIGHT | ACATTCTTCACACCATAGCAACGA     | 2 |
| DRCMAN2018V_54_LEFT  | ACTCTGGACAAGTATTT CATGTGCT   | 2 |
| DRCMAN2018V_54_RIGHT | TCGTGTCTCAGAGATGGATCGC       | 2 |
| DRCMAN2018V_56_LEFT  | CCTTGGACAGTTAACACTCGGC       | 2 |
| DRCMAN2018V_56_RIGHT | TCGTCTTCGAAGTCAGCTGACG       | 2 |
| DRCMAN2018V_58_LEFT  | TCAACAATAATACAGAGACACCGGT    | 2 |
| DRCMAN2018V_58_RIGHT | ATTCCATCCCCGATAGTCCAGC       | 2 |
| DRCMAN2018V_60_LEFT  | AAAACCATTTTTGGAAGCACGAGT     | 2 |
| DRCMAN2018V_60_RIGHT | ATACTGAGCTGGTACTTCCCGG       | 2 |
| DRCMAN2018V_62_LEFT  | AACGGCTGAACATCATAGAAGATGA    | 2 |
| DRCMAN2018V_62_RIGHT | CGCATCTGAGAGTCCTCTGTCA       | 2 |
| DRCMAN2018V_64_LEFT  | AGATCGTAGAACTGCTGGTGCA       | 2 |

|                      |                               |   |
|----------------------|-------------------------------|---|
| DRCMAN2018V_64_RIGHT | GCTGTACCACAAGCAGAGTCAC        | 2 |
| DRCMAN2018V_66_LEFT  | AGGGACACGCCAATTA ACTTCA       | 2 |
| DRCMAN2018V_66_RIGHT | TGGCTTGCTGAGTTGTTAAGGA        | 2 |
| DRCMAN2018V_68_LEFT  | CCAGCGTATTGAAAGCAGTGGT        | 2 |
| DRCMAN2018V_68_RIGHT | AGTGGACCTCTTTTTGAATCGACG      | 2 |
| DRCMAN2018V_70_LEFT  | ACTGCAAAAGGACGAATCACAAAAC     | 2 |
| DRCMAN2018V_70_RIGHT | GGGACTCCTTTCGTTATTTAAATAGTTGT | 2 |
| DRCMAN2018V_72_LEFT  | TGACGCAACGTAATAAATTCTGCAC     | 2 |
| DRCMAN2018V_72_RIGHT | GCCTTCTGATAAGCGTGGTCAA        | 2 |
